# Supplementary material
Source: PubMed Central journal article supplement (PMC7300852)
Supplement: IJC-147-3267-s001.pdf [file IJC-147-3267-s001.pdf]

## **Low prevalence of IgG antibodies to SARS-CoV-2 in cancer patients with COVID-19**

Tao Liu\*; Guang Zeng\*; Huangheng Tao\*; Yue Shi\*; COVID-19 in Cancer Patients Research Group; Ting Wang†; Tongzu Liu†; Fangjian Guo†; Fuling Zhou†; Xinghuan Wang†

\* Contributing equally as first authors

† Contributing equally as senior authors

Members of COVID-19 in Cancer Patients Research Group include: Tao Liu; Yue Shi; Hongjie Shi; Xiaoyue Zhang; Wenjun Ding; Yang Li; Xi Tong

### **Table of Contents**

|          |        |
|----------|--------|
| Table S1 | Page 2 |
| Table S2 | Page 3 |

Table S1. Characteristics of cancer patients with COVID-19 and other hospitalized COVID-19 patients.

|                                         | Mean (95% Confidence Interval), Median (Interquartile Range), or n (%) |                               | P values |
|-----------------------------------------|------------------------------------------------------------------------|-------------------------------|----------|
|                                         | Cancer Patients<br>(n=40)                                              | COVID-19 Patients<br>(n=1430) |          |
| Mean Age (years)                        | 61.0 (56.8-65.2)                                                       | 58.7 (57.9-59.4)              | 0.3      |
| Age group (years)                       |                                                                        |                               |          |
| ≤70                                     | 31 (77.5)                                                              | 1150 (80.4)                   | 0.65*    |
| >70                                     | 9 (22.5)                                                               | 280 (19.6)                    |          |
| Sex                                     |                                                                        |                               |          |
| Female                                  | 22 (55.0)                                                              | 723 (50.6)                    | 0.58*    |
| Male                                    | 18 (45.0)                                                              | 707 (49.4)                    |          |
| Days from symptom onset to IgM/IgG test | 39(30-53)                                                              | 41(33-49)                     | 0.89     |
| Days from symptom onset to RT-PCR test  | 31(27-34)                                                              | 39(34-43)                     | 0.11     |

Age was reported as mean (95% confidence interval). P value for the difference was from Student's t-test.

Days from symptom onset to IgM/IgG test and days from symptom onset to RT-PCR test were summarized as median and interquartile range. P values for the differences were from Mann-Whitney tests.

\* P value from the  $\chi^2$  test.

Table S2. Characteristics of cancer patients with COVID-19 by IgG antibodies to SARS-CoV-2 status.

|                                   | Mean (95% CI) or n (%) |                    | P Value |
|-----------------------------------|------------------------|--------------------|---------|
|                                   | Positive<br>(n=29)     | Negative<br>(n=11) |         |
| Age (years)                       | 61.8 (56.6-67.1)       | 58.8 (51.3-66.4)   | 0.52    |
| Age group (years)                 |                        |                    |         |
| ≤70                               | 21 (72.4)              | 10 (90.9)          | 0.4*    |
| >70                               | 8 (27.6)               | 1 (9.1)            |         |
| Sex                               |                        |                    |         |
| Female                            | 16 (55.2)              | 6 (54.5)           | 0.97*   |
| Male                              | 13 (44.8)              | 5 (45.5)           |         |
| Severity of COVID-19 at admission |                        |                    |         |
| Moderate                          | 20 (69.0)              | 9 (81.8)           | 0.69*   |
| Severe                            | 9 (31.0)               | 2 (18.2)           |         |
| Clinical characteristics          |                        |                    |         |
| Progression to critical status    |                        |                    |         |
| No                                | 27 (93.1)              | 9 (81.8)           | 0.3*    |
| Yes                               | 2 (6.9)                | 2 (18.2)           |         |
| ICU admission                     |                        |                    |         |
| No                                | 27 (93.1)              | 10 (90.9)          | 0.81*   |
| Yes                               | 2 (6.9)                | 1 (9.1)            |         |
| Death                             |                        |                    |         |
| No                                | 28 (96.6)              | 10 (90.9)          | 0.48*   |
| Yes                               | 1 (3.4)                | 1 (9.1)            |         |

Positive: cancer patients who had IgG antibodies to SARS-CoV-2.

Negative: cancer patients who did not have IgG antibodies to SARS-CoV-2.

\* P value from Fisher's exact test.
